# Supplementary material for: Sauna dehydration as a new physiological challenge model for intestinal barrier function
Source: PubMed Central journal article supplement (PMC8324874; doi:10.1038/s41598-021-94814-0), 2021-07-30
Supplement: 41598_2021_94814_MOESM1_ESM.pdf [file 41598_2021_94814_MOESM1_ESM.pdf]

# **Sauna dehydration as a new physiological challenge model for intestinal barrier function**

M. Fernanda Roca Rubio<sup>1\*</sup>, Ulrika Eriksson<sup>2</sup>, Robert J Brummer<sup>1</sup> and Julia König<sup>1</sup>

<sup>1</sup>Nutrition-Gut-Brain Interactions Research Centre, Faculty of Medicine and Health, School of Medical Sciences, Örebro University, 701 82 Örebro, Sweden.

<sup>2</sup>Man-Technology-Environment (MTM) Research Centre, School of Science and Technology, Örebro University, 701 82 Örebro, Sweden.

\*Corresponding author: [fernanda.roca@oru.se](mailto:fernanda.roca@oru.se)

**Supplementary material**

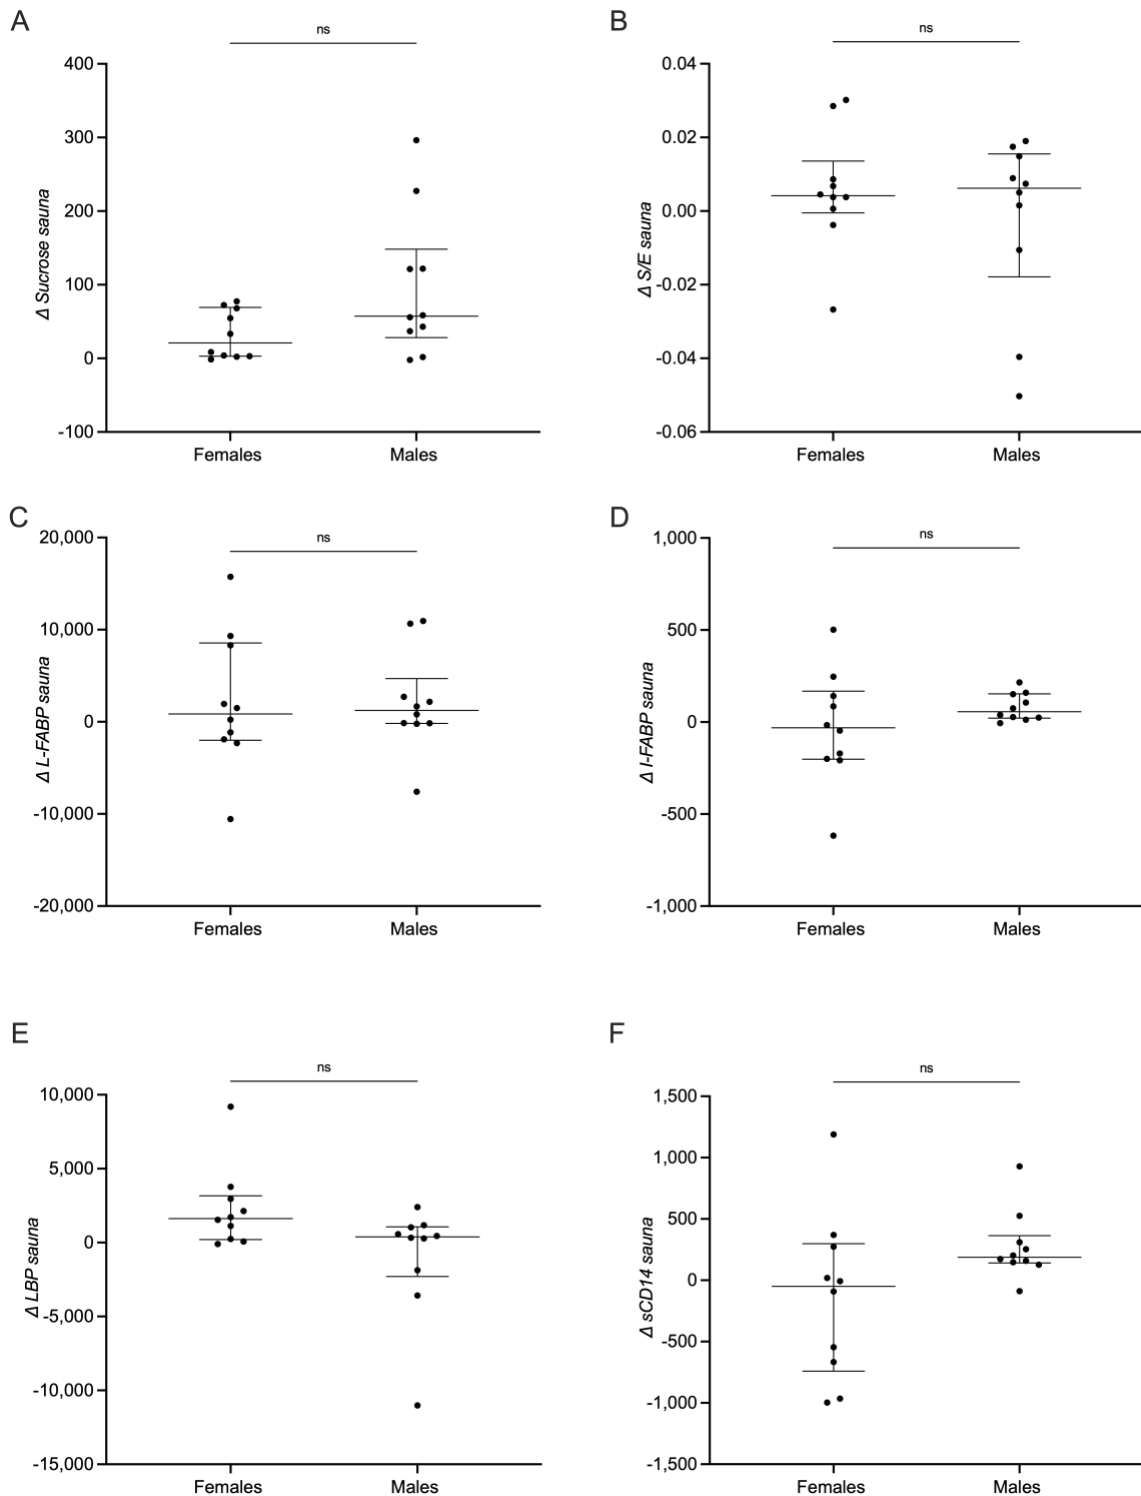

**Supplementary Fig S1.** Differences between female and male participants. Data is represented as  $\Delta$  values: sauna value - control value. (A) Gastroduodenal permeability measured by urinary sucrose recovery (0-5h). (B) Colonic permeability measured by urinary sucralose/erythritol (S/E) excretion ratio (5-24h). (C) Plasma concentrations of intestinal fatty acid-binding protein (I-FABP). (D) Plasma concentrations of liver fatty acid-binding protein (L-FABP). (E) Plasma concentrations of lipopolysaccharide-binding protein (LBP). (F) Plasma concentrations of soluble CD14 (sCD14). The horizontal line marks the median, the vertical line spans through the interquartile range (IQR). The dots represent the individuals. ns, non-significant.

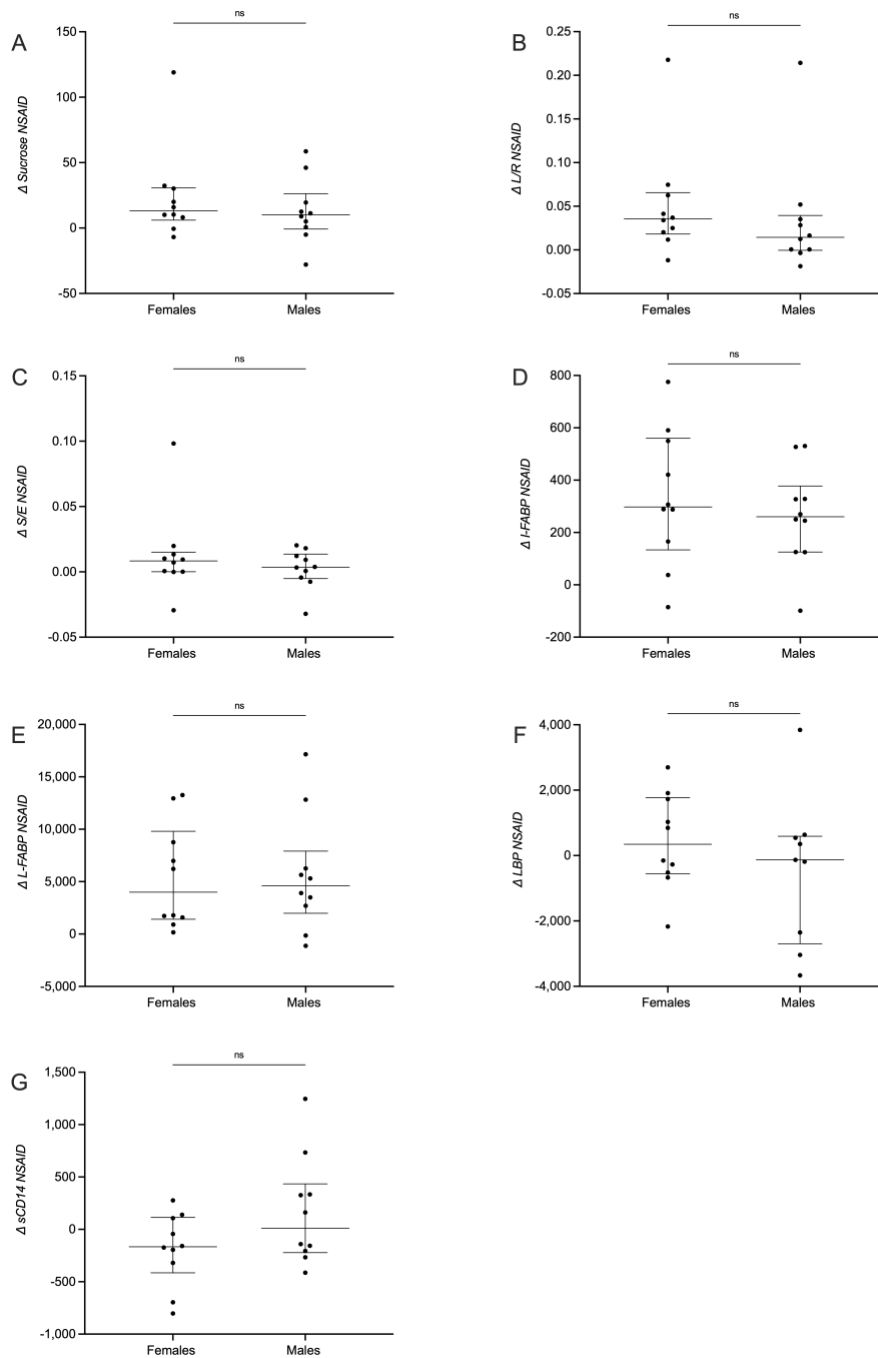

**Supplementary Fig S2.** Differences between female and male participants. Data is represented as  $\Delta$  values: NSAID value - control value. (A) Gastroduodenal permeability measured by urinary sucrose recovery (0-5h). (B) Small intestinal permeability measured by lactulose/rhamnose (L/R) excretion ratio (0-5h). (C) Colonic permeability measured by urinary sucralose/erythritol (S/E) excretion ratio (5-24h). (D) Plasma concentrations of intestinal fatty acid-binding protein (I-FABP). (E) Plasma concentrations of liver fatty acid-binding protein (L-FABP). (F) Plasma concentrations of lipopolysaccharide-binding protein (LBP). (G) Plasma concentrations of soluble CD14 (sCD14). The horizontal line marks the median, the vertical line spans through the interquartile range (IQR). The dots represent the individuals. ns, non-significant. NSAID, nonsteroidal anti-inflammatory drug.

**Supplementary Table S1.** Correlations between body temperature and markers associated with intestinal permeability and cytokines after the sauna condition.

|                                | <b>15 min in the sauna</b> | <b>1.5% dehydration</b> | <b>3% dehydration</b> |
|--------------------------------|----------------------------|-------------------------|-----------------------|
| <b>Sucrose</b>                 | r=-0.055; p=0.858          | r=-0.006; p=0.986       | r=-0.634; p=0.020     |
| <b>L/R</b>                     | r=-0.443; p=0.130          | r=-0.075; p=0.809       | r=-0.377; p=0.204     |
| <b>S/E</b>                     | r=-0.234; p=0.442          | r=-0.586; p=0.035       | r=-0.416; p=0.157     |
| <b>I-FABP</b>                  | r=0.267; p=0.378           | r=-0.450; p=0.123       | r=-0.270; p=0.372     |
| <b>L-FABP</b>                  | r=0.341; p=0.254           | r=0.030; p=0.922        | r=0.275; p=0.362      |
| <b>LBP</b>                     | r=0.000; p=1.000           | r=-0.561; p=0.046       | r=-0.094; p=0.761     |
| <b>sCD14</b>                   | r=-0.286; p=0.343          | r=-0.365; p=0.221       | r=-0.521; p=0.068     |
| <b>IL-6</b>                    | r=-0.536; p=0.059          | r=0.254; p=0.402        | r=0.350; p=0.241      |
| <b>IL-8</b>                    | r=0.025; r=0.936           | r=-0.193; r=0.527       | r=-0.314; r=0.296     |
| <b>IL-10</b>                   | r=-0.593; p=0.033          | r=0.699; p= 0.008       | r=0.611; p= 0.026     |
| <b>IFN-<math>\gamma</math></b> | r=0.407; p=0.167           | r=-0.039; p=0.900       | r=0.253; p=0.403      |
| <b>TNF-<math>\alpha</math></b> | r=0.149; p=0.628           | r=0.401; p=0.175        | r=0.515; p=0.072      |

P-values smaller than 0.0015 (0.05/33, Bonferroni) were considered as significant. n=13.

**Supplementary Table S2.** Correlations between cytokines and L/R ratio after the sauna condition.

|                        | $\Delta$ L/R      |
|------------------------|-------------------|
| $\Delta$ IL-6          | r=-0.114, p=0.634 |
| $\Delta$ IL-8          | r=-0.078, p=0.743 |
| $\Delta$ IL-10         | r=0.217, p=0.358  |
| $\Delta$ IFN- $\gamma$ | r=-0.483, p=0.031 |
| $\Delta$ TNF- $\alpha$ | r=-0.065, p=0.787 |

P-values smaller than 0.01 (0.05/5, Bonferroni) were considered as significant.  $\Delta$ : sauna value – control value.

**Supplementary Table S3.** Correlations between cytokines and markers associated with intestinal permeability after the sauna condition.

|                 | $\Delta$ IL-6       | $\Delta$ IL-8       | $\Delta$ IL-10      | $\Delta$ IFN- $\gamma$ | $\Delta$ TNF- $\alpha$ |
|-----------------|---------------------|---------------------|---------------------|------------------------|------------------------|
| $\Delta$ I-FABP | r=0.147<br>p=0.537  | r=-0.108<br>p=0.650 | r=0.159<br>p=0.503  | r=-0.014<br>p=0.955    | r=-0.114<br>p=0.631    |
| $\Delta$ L-FABP | r=0.326<br>p=0.160  | r=0.183<br>p=0.439  | r=-0.039<br>p=0.872 | r=-0.032<br>p=0.895    | r=0.125<br>p=0.600     |
| $\Delta$ LBP    | r=-0.118<br>p=0.620 | r=-0.224<br>p=0.342 | r=0.063<br>p=0.793  | r=0.295<br>p=0.207     | r=0.173<br>p=0.466     |
| $\Delta$ sCD14  | r=-0.139<br>p=0.558 | r=0.573<br>p=0.008  | r=0.167<br>p=0.481  | r=-0.102<br>p=0.960    | r=0.147<br>p=0.535     |

P-values smaller than 0.0025 (0.05/20, Bonferroni) were considered as significant.  $\Delta$ : sauna value – control value.

**Supplementary Table S4.** Correlations between plasma markers associated with intestinal permeability and small bowel permeability after the sauna condition.

|                  | $\Delta L/R$      |
|------------------|-------------------|
| $\Delta I$ -FABP | r=0.144, p=0.544  |
| $\Delta L$ -FABP | r=0.168, p=0.478  |
| $\Delta LBP$     | r=-0.188, p=0.427 |
| $\Delta sCD14$   | r=-0.053, p=0.826 |

P-values smaller than 0.0125 (0.05/4, Bonferroni) were considered as significant.  $\Delta$ : sauna value – control value.

**Supplementary Table S5.** Correlations between plasma markers associated with intestinal permeability and small bowel permeability after the NSAID intervention.

|                  | $\Delta L/R$      |
|------------------|-------------------|
| $\Delta I$ -FABP | r=0.325, p=0.162  |
| $\Delta L$ -FABP | r=0.296, p=0.205  |
| $\Delta LBP$     | r=-0.117, p=0.662 |
| $\Delta sCD14$   | r=-0.009, p=0.970 |

P-values smaller than 0.0125 (0.05/4, Bonferroni) were considered as significant.  $\Delta$ : NSAID value – control value.

## Supplementary Table S6: Exclusion criteria

- Abdominal surgery which might influence gastrointestinal function, except appendectomy and cholecystectomy
- Current diagnosis of hypertension
- Current diagnosis of psychiatric disease
- Over 100kg or with a BMI over 35
- Systemic use of steroids in the last 6 weeks
- Use of antibiotics or antimicrobial medication in the last month
- Daily usage of NSAID in the last 2 months or incidental use in the last 2 weeks prior to screening
- Usage of medications that could affect the barrier function, except oral contraceptives, during the 14 days prior to screening
- Diagnosed inflammatory gastrointestinal disease
- Known organic gastrointestinal disease (e.g. IBS, IBD, Chronic diarrhoea or constipation)
- History of or present gastrointestinal malignancy or polyposis
- Recent (gastrointestinal) infection (within last 6 months)
- Eosinophilic disorders of the gastrointestinal tract
- Current communicable disease (e.g. upper respiratory tract infection)
- Malignant disease and /or patients who are receiving systemic anti-neoplastic agents)
- Chronic neurological/neurodegenerative diseases (e.g. Parkinson's disease, multiple sclerosis)
- Autoimmune disease and/or patients receiving immunosuppressive medications
- Major relevant allergies (e.g. food allergy, multiple allergies)
- Chronic pain syndromes (e.g. fibromyalgia)
- Chronic fatigue syndrome
- Regular use of probiotics in the last 6 weeks
- Smoking and/or chewable tobacco
- Planned changes to current diet or exercise regime
- Use of laxatives, anti-diarrhoeotics, anti-cholinergics within last 4 weeks prior to screening
- Use of immunosuppressant drugs within last 4 weeks prior to screening
- Women: Pregnancy, lactation
- Abuse of alcohol or drugs
- Any disease/condition which in the investigator's opinion could interfere with the intestinal barrier function
- Any clinically significant disease/condition which in the investigator's opinion could interfere with the results of the trial

**Supplementary Table S7. Data file**

| <b>Subject ID</b> | <b>Age<br/>(years)</b> | <b>sex</b> | <b>Weight<br/>(kg)</b> | <b>Height<br/>(m)</b> | <b>BMI<br/>(Kg/m<sup>2</sup>)</b> |
|-------------------|------------------------|------------|------------------------|-----------------------|-----------------------------------|
| DH001             | 23                     | F          | 66                     | 1.7                   | 22.8                              |
| DH002             | 36                     | M          | 71                     | 1.75                  | 23.2                              |
| DH003             | 27                     | M          | 72.7                   | 1.73                  | 24.3                              |
| DH004             | 23                     | F          | 62.3                   | 1.68                  | 22.1                              |
| DH005             | 26                     | F          | 60.5                   | 1.68                  | 21.4                              |
| DH006             | 24                     | M          | 91.1                   | 1.97                  | 23.5                              |
| DH007             | 38                     | F          | 54.9                   | 1.68                  | 19.5                              |
| DH008             | 23                     | F          | 83.8                   | 1.74                  | 27.7                              |
| DH009             | 24                     | M          | 86                     | 1.76                  | 27.8                              |
| DH010             | 24                     | M          | 86.8                   | 1.9                   | 24.0                              |
| DH011             | 24                     | F          | 55.8                   | 1.71                  | 19.1                              |
| DH012             | 28                     | F          | 56.2                   | 1.64                  | 20.9                              |
| DH013             | 23                     | F          | 70                     | 1.67                  | 25.1                              |
| DH014             | 25                     | F          | 55.6                   | 1.65                  | 20.4                              |
| DH015             | 29                     | M          | 86.6                   | 1.83                  | 25.9                              |
| DH016             | 26                     | M          | 93.2                   | 1.78                  | 29.4                              |
| DH017             | 21                     | F          | 54.7                   | 1.63                  | 20.6                              |
| DH018             | 28                     | M          | 73.7                   | 1.75                  | 24.1                              |
| DH019             | 38                     | M          | 78.7                   | 1.96                  | 20.5                              |
| DH020             | 23                     | M          | 73.9                   | 1.92                  | 20.0                              |



**Supplementary Table S7. Data file**

| <b>Subject ID</b> | <b>Time to 1.5%<br/>dehydration</b> | <b>Time to 3%<br/>dehydration</b> | <b>LR ratio<br/>Control</b> | <b>LR ratio<br/>NSAID</b> | <b>LR ratio<br/>Sauna</b> |
|-------------------|-------------------------------------|-----------------------------------|-----------------------------|---------------------------|---------------------------|
| <b>DH001</b>      | 02:17                               | 04:15                             | 0.022663301                 | 0.240485058               | 0.06968805                |
| <b>DH002</b>      | 01:54                               | 04:09                             | 0.048910912                 | 0.049504694               | 0.085875299               |
| <b>DH003</b>      | 01:20                               | 02:32                             | 0.017726847                 | 0.034156414               | 0.028235052               |
| <b>DH004</b>      | 01:26                               | 03:20                             | 0.028198687                 | 0.048429799               | 0.059032706               |
| <b>DH005</b>      | 02:12                               | 04:56                             | 0.028114844                 | 0.069446037               | 0.11820283                |
| <b>DH006</b>      | 01:42                               | 03:26                             | 0.06335837                  | 0.277621965               | 0.204674793               |
| <b>DH007</b>      | 02:01                               | 03:45                             | 0.048659192                 | 0.036805061               | 0.044332504               |
| <b>DH008</b>      | 02:41                               | 04:01                             | 0.043120221                 | 0.054978826               | 0.050585837               |
| <b>DH009</b>      | 02:33                               | 03:55                             | 0.023699692                 | 0.052144274               | 0.137227047               |
| <b>DH010</b>      | 01:26                               | 02:44                             | 0.014448519                 | 0.06639023                | 0.089909562               |
| <b>DH011</b>      | 01:15                               | 02:29                             | 0.042738077                 | 0.117472017               | 0.044031096               |
| <b>DH012</b>      | 01:38                               | 03:16                             | 0.016842798                 | 0.079453393               | 0.046391352               |
| <b>DH013</b>      | 01:50                               | 03:30                             | 0.013191827                 | 0.038168707               | 0.029265536               |
| <b>DH014</b>      | 01:48                               | 03:06                             | 0.038010442                 | 0.074977924               | 0.053835164               |
| <b>DH015</b>      | 01:56                               | 03:50                             | 0.039064986                 | 0.039607273               | 0.16755477                |
| <b>DH016</b>      | 01:55                               | 03:45                             | 0.030226382                 | 0.026677543               | 0.038875839               |
| <b>DH017</b>      | 01:26                               | 02:41                             | 0.038102144                 | 0.072194584               | 0.041048926               |
| <b>DH018</b>      | 01:33                               | 03:48                             | 0.013845337                 | 0.026329897               | 0.098510469               |
| <b>DH019</b>      | 01:26                               | 03:11                             | 0.018611224                 | Missing <sup>1</sup>      | 0.061806522               |
| <b>DH020</b>      | 01:52                               | 03:20                             | 0.015324783                 | 0.050520398               | 0.059325895               |

<sup>1</sup> Sample missing due to errors in the 0-5h urine collection

**Supplementary Table S7. Data file**

| <b>Subject ID</b> | <b>SE ratio<br/>Control</b> | <b>SE ratio<br/>Positive</b> | <b>SE ratio<br/>Sauna</b> | <b>Sucrose<br/>(µg/mL)<br/>Control</b> | <b>Sucrose<br/>(µg/mL)<br/>NSAID</b> |
|-------------------|-----------------------------|------------------------------|---------------------------|----------------------------------------|--------------------------------------|
| <b>DH001</b>      | 0.057422654                 | 0.028087449                  | 0.030691988               | 6.782                                  | 36.972                               |
| <b>DH002</b>      | 0.077677904                 | 0.045607657                  | 0.027388584               | 15.562                                 | 74.212                               |
| <b>DH003</b>      | 0.036418981                 | 0.040227741                  | 0.037962128               | 4.158                                  | 4.824                                |
| <b>DH004</b>      | 0.018232394                 | 0.028445641                  | 0.018844607               | 5.388                                  | 15.486                               |
| <b>DH005</b>      | 0.02014852                  | 0.118347718                  | 0.050337505               | 38.954                                 | 157.916                              |
| <b>DH006</b>      | 0.027905059                 | 0.037181229                  | 0.045360725               | 41.944                                 | 61.508                               |
| <b>DH007</b>      | 0.02827853                  | 0.028238341                  | 0.032061244               | 5.854                                  | 5.34                                 |
| <b>DH008</b>      | 0.02458753                  | 0.044384693                  | 0.03319868                | 19.79                                  | 39.818                               |
| <b>DH009</b>      | 0.032468191                 | 0.033191998                  | 0.037511229               | 21.648                                 | 67.78                                |
| <b>DH010</b>      | 0.020438656                 | 0.038531981                  | 0.035308843               | 6.158                                  | 11.27                                |
| <b>DH011</b>      | 0.018063901                 | 0.031491021                  | 0.021827917               | 6.386                                  | 16.734                               |
| <b>DH012</b>      | 0.021544492                 | 0.030991399                  | 0.026072632               | 12.216                                 | 44.584                               |
| <b>DH013</b>      | 0.028165888                 | 0.028734381                  | 0.034957665               | 9.6                                    | 25.576                               |
| <b>DH014</b>      | 0.017685782                 | 0.024895605                  | 0.046191956               | 13.308                                 | 21.504                               |
| <b>DH015</b>      | 0.088238331                 | 0.080737071                  | 0.048618285               | 3.958                                  | 12.948                               |
| <b>DH016</b>      | 0.049792612                 | 0.045482678                  | 0.039205884               | 4.27                                   | 15.574                               |
| <b>DH017</b>      | 0.021408802                 | 0.021574813                  | 0.017631293               | 19.76                                  | 12.85                                |
| <b>DH018</b>      | 0.029742195                 | 0.033110444                  | 0.048779095               | 9.718                                  | 4.662                                |
| <b>DH019</b>      | 0.02728297                  | 0.047548052                  | 0.034691825               | 27.928                                 | Missing <sup>1</sup>                 |
| <b>DH020</b>      | 0.020049071                 | 0.032196738                  | 0.028983353               | 5.048                                  | 17.546                               |

<sup>1</sup> Sample missing due to errors in the 0-5h urine collection

**Supplementary Table S7. Data file**

| <b>Subject ID</b> | <b>Suc<br/>(µg/ml)<br/>Sauna</b> | <b>I-FABP<br/>(pg/ml)<br/>Control</b> | <b>I-FABP<br/>(pg/ml)<br/>NSAID</b> | <b>I-FABP<br/>(pg/ml)<br/>Sauna</b> | <b>L-FABP<br/>(pg/ml)<br/>Cntrl</b> |
|-------------------|----------------------------------|---------------------------------------|-------------------------------------|-------------------------------------|-------------------------------------|
| <b>DH001</b>      | 84.246                           | 844.66                                | 1435.34                             | 227.908                             | 12133.98                            |
| <b>DH002</b>      | 136.926                          | 483.4913333                           | 733.72                              | 634.6466667                         | 14198.19333                         |
| <b>DH003</b>      | 41.112                           | 187.9326667                           | 718.448                             | 403.1093333                         | 9676.386667                         |
| <b>DH004</b>      | 60.042                           | 393.8866667                           | 431.378                             | 377.6866667                         | 12821.05333                         |
| <b>DH005</b>      | 111.438                          | 35.28466667                           | 810.5766667                         | 536.9526667                         | 1722.893333                         |
| <b>DH006</b>      | 269.24                           | 314.3426667                           | 439.0126667                         | 338.7866667                         | 11051.16                            |
| <b>DH007</b>      | 39.056                           | 184.834                               | 472.5886667                         | 326.6926667                         | 10277.59333                         |
| <b>DH008</b>      | 22.892                           | 166.8613333                           | 455.518                             | 251.9693333                         | 1660.753333                         |
| <b>DH009</b>      | 143.596                          | 188.5933333                           | 715.5513333                         | 263.0893333                         | 1797.5                              |
| <b>DH010</b>      | 302.458                          | 442.4873333                           | 770.448                             | 454.658                             | 14907.63333                         |
| <b>DH011</b>      | 4.91                             | 284.0506667                           | 704.6906667                         | 237.5793333                         | 1724.233333                         |
| <b>DH012</b>      | 80.326                           | 297.592                               | 212.3306667                         | 127.0106667                         | 16217.40667                         |
| <b>DH013</b>      | 18.168                           | 275.6093333                           | 582.2766667                         | 522.57                              | 1923.893333                         |
| <b>DH014</b>      | 15.55                            | 588.72                                | 1138.526                            | 381.4986667                         | 15870.5                             |
| <b>DH015</b>      | 47.056                           | 281.53                                | 526.514                             | 440.2406667                         | 1802.3                              |
| <b>DH016</b>      | 62.886                           | 292.386                               | 417.6406667                         | 319.976                             | 1812.76                             |
| <b>DH017</b>      | 23.686                           | 408.0366667                           | 573.6173333                         | 208.4293333                         | 12883.28667                         |
| <b>DH018</b>      | 7.52                             | 530.6353333                           | 431.802                             | 524.6493333                         | 14379.15333                         |
| <b>DH019</b>      | 29.682                           | 420.0266667                           | 690.0286667                         | 458.5846667                         | 9248.753333                         |
| <b>DH020</b>      | 60.982                           | 185.7946667                           | 512.7486667                         | 291.3406667                         | 2042.566667                         |

**Supplementary Table S7. Data file**

| <b>Subject ID</b> | <b>L-FABP<br/>(pg/ml)<br/>NSAID</b> | <b>L-FABP<br/>(pg/ml)<br/>Sauna</b> | <b>LBP<br/>(ng/ml)<br/>Control</b> | <b>LBP<br/>(ng/ml)<br/>NSAID</b> | <b>LBP<br/>(ng/ml)<br/>Sauna</b> |
|-------------------|-------------------------------------|-------------------------------------|------------------------------------|----------------------------------|----------------------------------|
| <b>DH001</b>      | 18348.38667                         | 1570.066667                         | 6947.5                             | 8858.333333                      | 8665.66667                       |
| <b>DH002</b>      | 16893.9                             | 15868.87                            | 11198                              | 8159                             | 11644.3333                       |
| <b>DH003</b>      | 14980.1                             | 11851.8                             | 4463.333333                        | 8305.666667                      | 6869.5                           |
| <b>DH004</b>      | 14601.98                            | 14761.61333                         | 8111.5                             | 5940                             | 11883.3333                       |
| <b>DH005</b>      | 14670.52                            | 11043.2                             | 8349.333333                        | 11048.66667                      | 9480                             |
| <b>DH006</b>      | 16691.65333                         | 13762.46667                         | 7422.333333                        | 8060                             | 7751.66667                       |
| <b>DH007</b>      | 11184.89333                         | 9123.386667                         | 5946.666667                        | 7673.333333                      | 8075                             |
| <b>DH008</b>      | 10423.96667                         | 9976.32                             | 5167                               | 5014                             | 5243.33333                       |
| <b>DH009</b>      | 18951.06                            | 1643.306667                         | 11852.33333                        | 12395                            | 12877.3333                       |
| <b>DH010</b>      | 18820.84667                         | 15723.20667                         | 15795.66667                        | 12129.66667                      | 12213.6667                       |
| <b>DH011</b>      | 14986.88                            | 1947.706667                         | 5568.333333                        | 4898.666667                      | 5475                             |
| <b>DH012</b>      | 16383.83333                         | 14314.94                            | 10533                              | 10014.66667                      | 10777.3333                       |
| <b>DH013</b>      | 8907.4                              | 17661.18                            | 6848.333333                        | 6576.333333                      | 8384.66667                       |
| <b>DH014</b>      | 17445.96667                         | 13566.47333                         | 6451                               | 7481.333333                      | 9407                             |
| <b>DH015</b>      | 5297.026667                         | 12754.50667                         | 7603.5                             | 7470                             | 8781.5                           |
| <b>DH016</b>      | 1670.026667                         | 1682.306667                         | 4498.5                             | 4312                             | 4776.5                           |
| <b>DH017</b>      | 14610.88667                         | 14374.63333                         | 13564.66667                        | 14410.66667                      | 22753                            |
| <b>DH018</b>      | 13250.95333                         | 14170.35333                         | 10392.5                            | 10747.66667                      | 10967.3333                       |
| <b>DH019</b>      | 15517.54                            | 1666.413333                         | 11615.66667                        | 9261.666667                      | 9748.33333                       |
| <b>DH020</b>      | 14863.27333                         | 12702.7                             | 23100*                             | 9189.333333*                     | 12078.6667*                      |

\*Excluded data due to disproportionately high baseline values.

**Supplementary Table S7. Data file**

| <b>Subject ID</b> | <b>sCD14<br/>(ng/ml)<br/>Control</b> | <b>sCD14<br/>(ng/ml)<br/>NSAID</b> | <b>sCD14<br/>(ng/ml)<br/>Sauna</b> | <b>IL6<br/>(pg/ml)<br/>Control</b> | <b>IL6<br/>(pg/ml)<br/>Sauna</b> |
|-------------------|--------------------------------------|------------------------------------|------------------------------------|------------------------------------|----------------------------------|
| <b>DH001</b>      | 2791.6                               | 1988.68                            | 3065.92                            | 0.00000                            | 1.75603                          |
| <b>DH002</b>      | 2097.76                              | 2424.24                            | 3027.08                            | 1.48613                            | 9.34268                          |
| <b>DH003</b>      | 1799.76                              | 2534.2                             | 2109.8                             | 0.00000                            | 1.81093                          |
| <b>DH004</b>      | 3216.4                               | 3173.24                            | 2250.72                            | 0.00000                            | 5.45587                          |
| <b>DH005</b>      | 3202.4                               | 2506.76                            | 2205.72                            | 0.00000                            | 1.53531                          |
| <b>DH006</b>      | 1672.76                              | 2007.04                            | 1926.12                            | 0.00000                            | 7.23251                          |
| <b>DH007</b>      | 1265                                 | 1404.64                            | 2453.6                             | 0.00000                            | 3.84927                          |
| <b>DH008</b>      | 1840.88                              | 1682.2                             | 2211.08                            | 0.00000                            | 11.8611                          |
| <b>DH009</b>      | 1484.8                               | 1344.16                            | 1657.36                            | 1.23306                            | 8.63654                          |
| <b>DH010</b>      | 1760.24                              | 1922.2                             | 2285.76                            | 0.00000                            | 0.00000                          |
| <b>DH011</b>      | 1841.64                              | 1521                               | 1834.6                             | 0.00000                            | 9.24615                          |
| <b>DH012</b>      | 2507.68                              | 2783.76                            | 1840.88                            | 0.00000                            | 11.3204                          |
| <b>DH013</b>      | 2185.12                              | 1989.68                            | 2204.76                            | 0.00000                            | 12.8571                          |
| <b>DH014</b>      | 2373.2                               | 2199.64                            | 1826.92                            | 0.00000                            | 1.97490                          |
| <b>DH015</b>      | 2196.8                               | 1930.6                             | 2322.96                            | 0.00000                            | 16.2766                          |
| <b>DH016</b>      | 2156.44                              | 2000.24                            | 2303.04                            | 0.00000                            | 16.0891                          |
| <b>DH017</b>      | 1550.88                              | 1657.2                             | 1458.8                             | 0.00000                            | 2.28479                          |
| <b>DH018</b>      | 1794.08                              | 1380.64                            | 1704.8                             | 0.00000                            | 8.38460                          |
| <b>DH019</b>      | 1711.32                              | 1504.92                            | 1913.28                            | 0.00000                            | 0.00000                          |
| <b>DH020</b>      | 1635.96                              | 2882.32                            | 1794.76                            | 4.95923                            | 8.93160                          |

**Supplementary Table S7. Data file**

| <b>Subject ID</b> | <b>IL8<br/>(pg/ml)<br/>Control</b> | <b>IL8<br/>(pg/ml)<br/>Sauna</b> | <b>IL10<br/>(pg/ml)<br/>Control</b> | <b>IL10<br/>(pg/ml)<br/>Sauna</b> | <b>INF-<math>\gamma</math><br/>(pg/ml)<br/>Contro</b> |
|-------------------|------------------------------------|----------------------------------|-------------------------------------|-----------------------------------|-------------------------------------------------------|
| <b>DH001</b>      | 5.97289                            | 10.25407                         | 0.00000                             | 0.00000                           | 6.01598                                               |
| <b>DH002</b>      | 7.17599                            | 9.89999                          | 0.00000                             | 0.00000                           | 14.27588                                              |
| <b>DH003</b>      | 5.27611                            | 8.52533                          | 0.00000                             | 0.00000                           | 8.00875                                               |
| <b>DH004</b>      | 6.12601                            | 7.49315                          | 1.45436                             | 0.73452                           | 8.40092                                               |
| <b>DH005</b>      | 9.75626                            | 8.17493                          | 0.00000                             | 0.00000                           | 5.09799                                               |
| <b>DH006</b>      | 4.91118                            | 9.39039                          | 0.00000                             | 0.00000                           | 20.0557                                               |
| <b>DH007</b>      | 5.60137                            | 12.96781                         | 0.00000                             | 0.00000                           | 15.78003                                              |
| <b>DH008</b>      | 5.13942                            | 8.33903                          | 0.00000                             | 0.69212                           | 5.21781                                               |
| <b>DH009</b>      | 6.90792                            | 9.42978                          | 0.00000                             | 1.40163                           | 8.91961                                               |
| <b>DH010</b>      | 3.82622                            | 7.39070                          | 0.00000                             | 0.00000                           | 52.55335                                              |
| <b>DH011</b>      | 6.49837                            | 13.36403                         | 0.89300                             | 0.73205                           | 6.97159                                               |
| <b>DH012</b>      | 4.73128                            | 7.23908                          | 0.00000                             | 0.59600                           | 5.39184                                               |
| <b>DH013</b>      | 5.04482                            | 7.84199                          | 0.00000                             | 0.00000                           | 28.1372                                               |
| <b>DH014</b>      | 4.89330                            | 5.99875                          | 0.59600                             | 0.00000                           | 4.05176                                               |
| <b>DH015</b>      | 5.13231                            | 8.92908                          | 0.00000                             | 1.16735                           | 6.95366                                               |
| <b>DH016</b>      | 5.87487                            | 7.97528                          | 0.68473                             | 0.00000                           | 8.68434                                               |
| <b>DH017</b>      | 6.76680                            | 6.77033                          | 0.59600                             | 0.74005                           | 22.25339                                              |
| <b>DH018</b>      | 7.08424                            | 7.88986                          | 0.00000                             | 0.00000                           | 6.34018                                               |
| <b>DH019</b>      | 9.17284                            | 8.19719                          | 0.00000                             | 0.00000                           | 8.24331                                               |
| <b>DH020</b>      | 3.70251                            | 8.97591                          | 2.81136                             | 0.00000                           | 17.88639                                              |

**Supplementary Table S7. Data file**

| <b>Subject ID</b> | <b>INF-<math>\gamma</math><br/>(pg/ml)<br/>Sauna</b> | <b>TNF-<math>\alpha</math><br/>(pg/ml)<br/>Control</b> | <b>TNF-<math>\alpha</math><br/>(pg/ml)<br/>Sauna</b> | <b>Temperature<br/>(Celcius)<br/>15min</b> |
|-------------------|------------------------------------------------------|--------------------------------------------------------|------------------------------------------------------|--------------------------------------------|
| <b>DH001</b>      | 7.28489                                              | 1.67579                                                | 2.59273                                              | 38                                         |
| <b>DH002</b>      | 17.48817                                             | 2.18899                                                | 2.61847                                              | 39                                         |
| <b>DH003</b>      | 8.25536                                              | 2.12861                                                | 2.40253                                              | 39.4                                       |
| <b>DH004</b>      | 7.75501                                              | 2.53825                                                | 2.77422                                              | 38.3                                       |
| <b>DH005</b>      | 5.1519                                               | 2.09293                                                | 2.36822                                              | 36.5                                       |
| <b>DH006</b>      | 13.18725                                             | 1.9019                                                 | 2.19628                                              | 38                                         |
| <b>DH007</b>      | 19.11327                                             | 1.94646                                                | 2.14463                                              | 38.9                                       |
| <b>DH008</b>      | 7.24254                                              | 2.35388                                                | 2.96537                                              | 36.2                                       |
| <b>DH009</b>      | 13.4917                                              | 2.29948                                                | 2.381                                                | 35.7                                       |
| <b>DH010</b>      | 11.17918                                             | 2.66999                                                | 2.78274                                              | Missing <sup>2</sup>                       |
| <b>DH011</b>      | 16.0437                                              | 2.21056                                                | 2.84092                                              | 36.1                                       |
| <b>DH012</b>      | 6.66574                                              | 2.07572                                                | 2.32645                                              | 35.9                                       |
| <b>DH013</b>      | 33.34557                                             | 3.03221                                                | 2.80965                                              | Missing <sup>2</sup>                       |
| <b>DH014</b>      | 3.34267                                              | 2.48405                                                | 2.32638                                              | Missing <sup>2</sup>                       |
| <b>DH015</b>      | 7.88151                                              | 1.85007                                                | 2.36099                                              | 34.6                                       |
| <b>DH016</b>      | 9.25869                                              | 2.60118                                                | 2.43518                                              | Missing <sup>2</sup>                       |
| <b>DH017</b>      | 35.70268                                             | 2.74706                                                | 3.02945                                              | 38.8                                       |
| <b>DH018</b>      | 6.88151                                              | 2.82393                                                | 2.4454                                               | Missing <sup>2</sup>                       |
| <b>DH019</b>      | 5.55953                                              | 2.44833                                                | 1.99248                                              | Missing <sup>2</sup>                       |
| <b>DH020</b>      | 5.01457                                              | 3.3127                                                 | 2.57834                                              | Missing <sup>2</sup>                       |

<sup>2</sup> Due to technical difficulties, temperature data of seven participants are missing from the analysis.

**Supplementary Table S7. Data file**

| <b>Subject ID</b> | <b>Temperature<br/>(Celcius)<br/>1.5%Deh</b> | <b>Temperature<br/>(Celcius)<br/>3%Deh</b> | <b>Salivary cortisol<br/>(nmol/L)<br/>Control Base<br/>line -2h</b> | <b>Salivary cortisol<br/>(nmol/L)<br/>Positive Base<br/>line -2h</b> | <b>Salivary cortisol<br/>(nmol/L)<br/>Sauna Base line<br/>-2h</b> |
|-------------------|----------------------------------------------|--------------------------------------------|---------------------------------------------------------------------|----------------------------------------------------------------------|-------------------------------------------------------------------|
| <b>DH001</b>      | 39.1                                         | 36.1                                       | 11.24                                                               | 5.015                                                                | 9.445                                                             |
| <b>DH002</b>      | 38.8                                         | 37.3                                       | 6.51                                                                | 10.775                                                               | 9.26                                                              |
| <b>DH003</b>      | 38                                           | 38.6                                       | 6.735                                                               | 5.98                                                                 | 11.78                                                             |
| <b>DH004</b>      | 39.7                                         | 39.1                                       | 7.14                                                                | 2.765                                                                | 4.25                                                              |
| <b>DH005</b>      | 38                                           | 36.9                                       | 7.175                                                               | 1.695                                                                | 3.365                                                             |
| <b>DH006</b>      | 37.9                                         | 38.6                                       | 4.33                                                                | 1.865                                                                | 6.055                                                             |
| <b>DH007</b>      | 37.9                                         | 37.5                                       | 6.61                                                                | 8.365                                                                | 9.325                                                             |
| <b>DH008</b>      | 38.1                                         | 39                                         | 22.02                                                               | 5.205                                                                | 1.815                                                             |
| <b>DH009</b>      | 40                                           | 37.9                                       | 5.745                                                               | 12.03                                                                | 5.34                                                              |
| <b>DH010</b>      | Missing <sup>2</sup>                         | 38.3                                       | Missing <sup>3</sup>                                                | 0.725                                                                | 2.685                                                             |
| <b>DH011</b>      | 39.6                                         | 39.5                                       | 9.94                                                                | 10.68                                                                | 9.375                                                             |
| <b>DH012</b>      | 39.7                                         | 38                                         | 12.425                                                              | 4.52                                                                 | 10.17                                                             |
| <b>DH013</b>      | Missing <sup>2</sup>                         | Missing <sup>2</sup>                       | 6.53                                                                | 13.025                                                               | 9.41                                                              |
| <b>DH014</b>      | Missing <sup>2</sup>                         | Missing <sup>2</sup>                       | 9.425                                                               | 9.745                                                                | 7.96                                                              |
| <b>DH015</b>      | 38.8                                         | 38.7                                       | 15.14                                                               | 18.355                                                               | 12.185                                                            |
| <b>DH016</b>      | Missing <sup>2</sup>                         | Missing <sup>2</sup>                       | 3.805                                                               | 4.565                                                                | 3.04                                                              |
| <b>DH017</b>      | 39.5                                         | 39.5                                       | 2.555                                                               | 4.41                                                                 | 3.08                                                              |
| <b>DH018</b>      | Missing <sup>2</sup>                         | 38.1                                       | 5.605                                                               | 3.045                                                                | 15.155                                                            |
| <b>DH019</b>      | Missing <sup>2</sup>                         | 37.8                                       | 3.62                                                                | 5.75                                                                 | 1.875                                                             |
| <b>DH020</b>      | Missing <sup>2</sup>                         | 38.1                                       | 1.62                                                                | 0.87                                                                 | 1.15                                                              |

<sup>2</sup>Due to technical difficulties, temperature data of seven participants are missing from the analysis.

<sup>3</sup>Sample missing due to errors in saliva collection



**Supplementary Table S7. Data file**

| <b>Subject ID</b> | <b>Salivary cortisol<br/>(nmol/L)<br/>Control Directly<br/>after sauna 1min</b> | <b>Salivary cortisol<br/>(nmol/L)<br/>Positive Directly<br/>after sauna 1min</b> | <b>Salivary cortisol<br/>(nmol/L)<br/>Sauna Directly<br/>after sauna 1min</b> |
|-------------------|---------------------------------------------------------------------------------|----------------------------------------------------------------------------------|-------------------------------------------------------------------------------|
| <b>DH001</b>      | 14.205                                                                          | 2.105                                                                            | 9.9                                                                           |
| <b>DH002</b>      | 2.31                                                                            | 6.595                                                                            | 8.485                                                                         |
| <b>DH003</b>      | 5.795                                                                           | 4.115                                                                            | 7.815                                                                         |
| <b>DH004</b>      | 4.13                                                                            | 2.285                                                                            | 19.285                                                                        |
| <b>DH005</b>      | 3.19                                                                            | 11.67                                                                            | 5.055                                                                         |
| <b>DH006</b>      | 17.07                                                                           | 3.84                                                                             | 5.26                                                                          |
| <b>DH007</b>      | 5.745                                                                           | 7.425                                                                            | 10.735                                                                        |
| <b>DH008</b>      | 1.8                                                                             | 9.75                                                                             | 20.24                                                                         |
| <b>DH009</b>      | 2.375                                                                           | 10.715                                                                           | 38.375                                                                        |
| <b>DH010</b>      | Missing <sup>3</sup>                                                            | 10.12                                                                            | 5.825                                                                         |
| <b>DH011</b>      | 10.54                                                                           | 9.41                                                                             | 6.67                                                                          |
| <b>DH012</b>      | 5.86                                                                            | 6.425                                                                            | 20.52                                                                         |
| <b>DH013</b>      | 8.765                                                                           | 8.67                                                                             | 19.715                                                                        |
| <b>DH014</b>      | 2.71                                                                            | 2.015                                                                            | 3.355                                                                         |
| <b>DH015</b>      | 4.265                                                                           | 4.27                                                                             | 42.375                                                                        |
| <b>DH016</b>      | 5.045                                                                           | 4.065                                                                            | 9.205                                                                         |
| <b>DH017</b>      | 12.015                                                                          | 10.04                                                                            | 12.19                                                                         |
| <b>DH018</b>      | 4.465                                                                           | 4.19                                                                             | 6.11                                                                          |
| <b>DH019</b>      | 13.205                                                                          | 9.725                                                                            | 10.425                                                                        |
| <b>DH020</b>      | 8.635                                                                           | 13.35                                                                            | 10.53                                                                         |

<sup>3</sup>Sample missing due to errors in saliva collection

**Supplementary Table S7. Data file**

| <b>Subject ID</b> | <b>Salivary cortisol<br/>(nmol/L)<br/>Control 2h after sauna</b> | <b>Salivary cortisol<br/>(nmol/L)<br/>Positive 2h after sauna</b> | <b>Salivary cortisol<br/>(nmol/L)<br/>Sauna 2h after sauna</b> |
|-------------------|------------------------------------------------------------------|-------------------------------------------------------------------|----------------------------------------------------------------|
| <b>DH001</b>      | 4.285                                                            | 3.16                                                              | 4.22                                                           |
| <b>DH002</b>      | 2.56                                                             | 2.27                                                              | 10.5                                                           |
| <b>DH003</b>      | 4.84                                                             | 3.075                                                             | 17.515                                                         |
| <b>DH004</b>      | 3.08                                                             | 4.505                                                             | 3.585                                                          |
| <b>DH005</b>      | 2.035                                                            | 4.19                                                              | 2.59                                                           |
| <b>DH006</b>      | 6.345                                                            | 7.295                                                             | 14.16                                                          |
| <b>DH007</b>      | 2.93                                                             | 2.93                                                              | 2.51                                                           |
| <b>DH008</b>      | 1.245                                                            | Missing <sup>3</sup>                                              | 3.86                                                           |
| <b>DH009</b>      | 1.545                                                            | 3.48                                                              | 9.645                                                          |
| <b>DH010</b>      | Missing <sup>3</sup>                                             | 1.96                                                              | 5.19                                                           |
| <b>DH011</b>      | 2.49                                                             | 2.88                                                              | 3.175                                                          |
| <b>DH012</b>      | 3.56                                                             | 3.6                                                               | 2.3                                                            |
| <b>DH013</b>      | 2.64                                                             | 2.56                                                              | 3.41                                                           |
| <b>DH014</b>      | 1.985                                                            | 2.425                                                             | 2.14                                                           |
| <b>DH015</b>      | 3.27                                                             | 3.925                                                             | 23.74                                                          |
| <b>DH016</b>      | 2.16                                                             | 0.785                                                             | 3.585                                                          |
| <b>DH017</b>      | 6.545                                                            | 15.725                                                            | 7.49                                                           |
| <b>DH018</b>      | 2.61                                                             | Missing <sup>3</sup>                                              | 5.025                                                          |
| <b>DH019</b>      | 4.195                                                            | 3.69                                                              | Missing <sup>3</sup>                                           |
| <b>DH020</b>      | 3.12                                                             | 3.75                                                              | 3.6                                                            |

<sup>3</sup>Sample missing due to errors in saliva collection
